# Supplementary material for: Polymeric Networks Containing Amine Derivatives as Organocatalysts for Knoevenagel Reaction within Continuously Driven Microfluidic Reactors
Source: MDPI journal article supplement (doi:10.3390/gels9030171), 2023-02-21
Supplement: s1 [file s1]

*Article*

# **Polymeric Networks Containing Amine Derivatives as Organocatalysts for Knoevenagel Reaction within Continuously Driven Microfluidic Reactors**

**Naresh Killi, Julian Bartenbach and Dirk Kuckling \***

Department of Chemistry, Faculty of Science, Paderborn University, Warburger Str. 100,  
33098 Paderborn, Germany

\* Correspondence: [dirk.kuckling@uni-paderborn.de](mailto:dirk.kuckling@uni-paderborn.de)

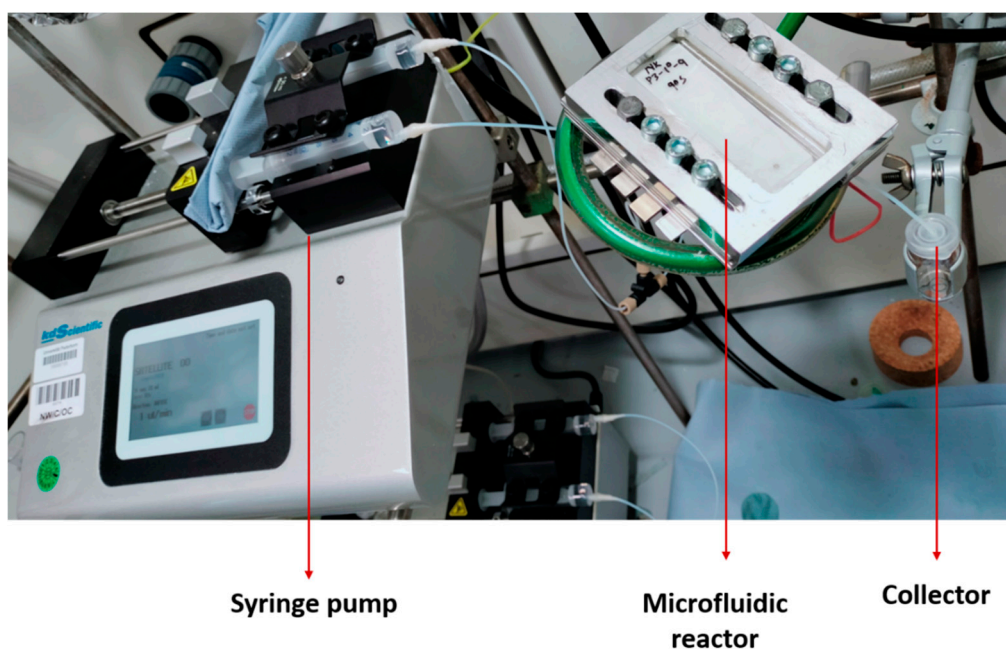

Figure S1: Microfluidic reaction setup.

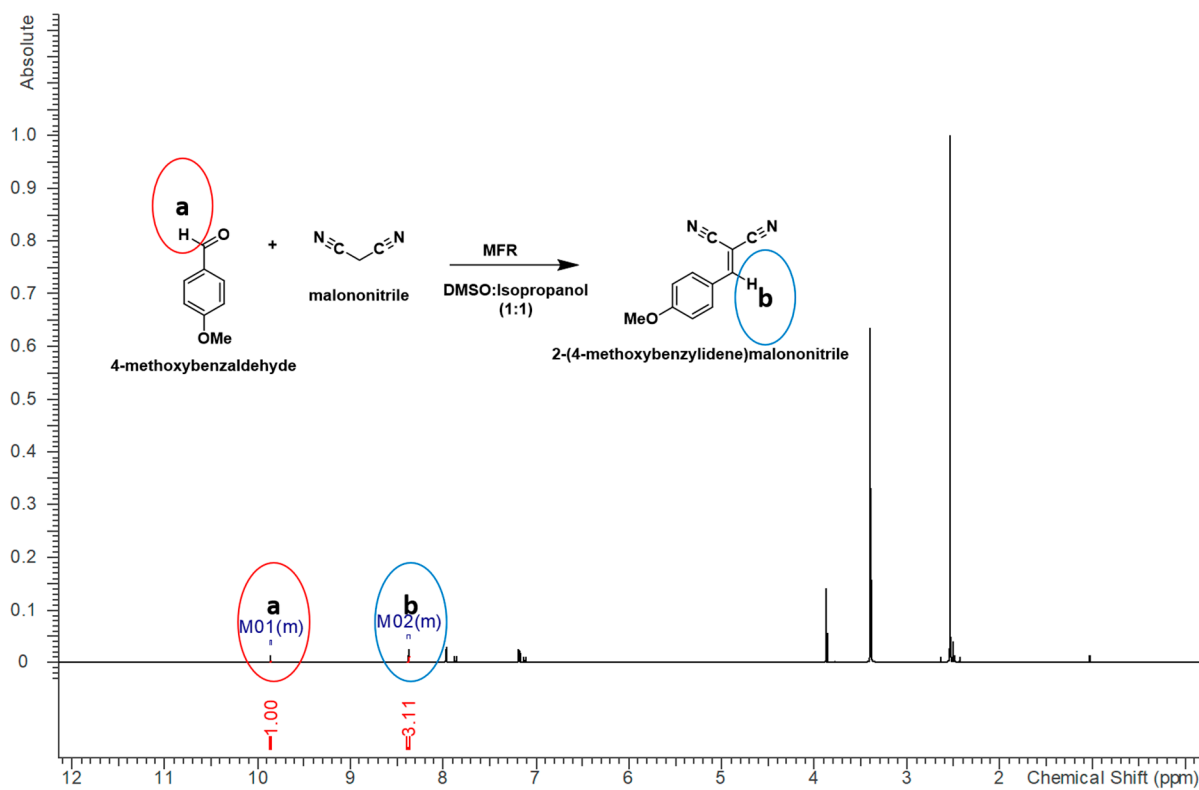

Figure S2:  $^1\text{H}$  spectra for determination of conversion of the reaction between 4-methoxy benzaldehyde and malononitrile using polymeric gel composition A in solvent mixture, DMSO:IP (v:v=1:1) for 8 h.

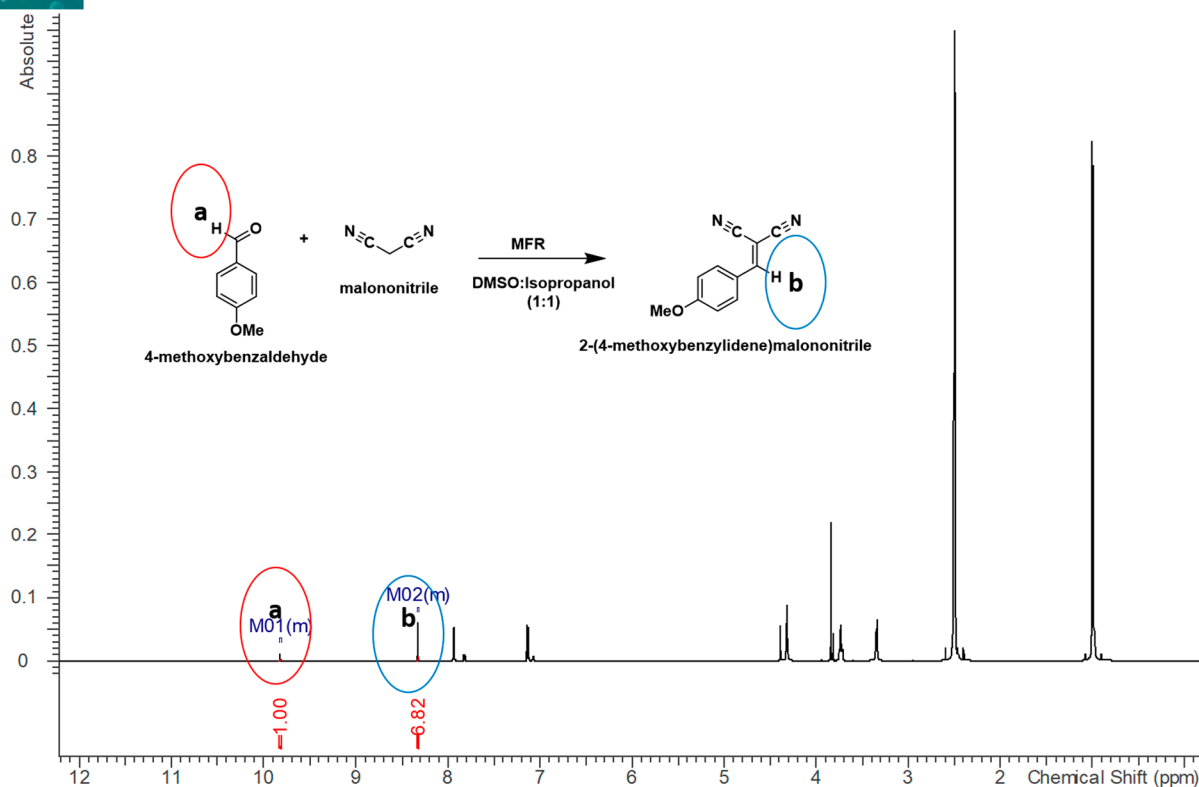

Figure S3:  $^1\text{H}$  spectra for determination of conversion of the reaction between 4-methoxy benzaldehyde and malononitrile using polymeric gel composition B in solvent mixture, DMSO:IP (v:v=1:1) for 8 h.

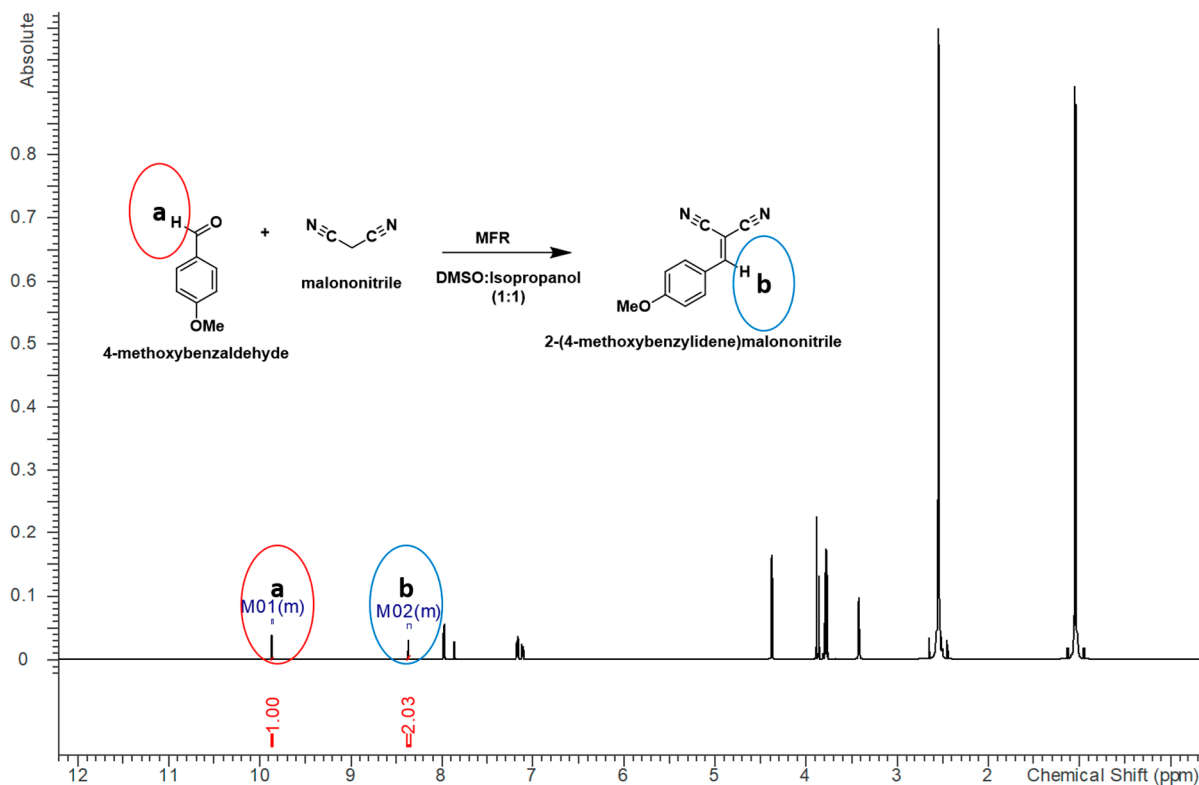

Figure S4:  $^1\text{H}$  spectra for determination of conversion of the reaction between 4-methoxy benzaldehyde and malononitrile using polymeric gel composition C in solvent mixture, DMSO:IP (v:v=1:1) for 8 h.

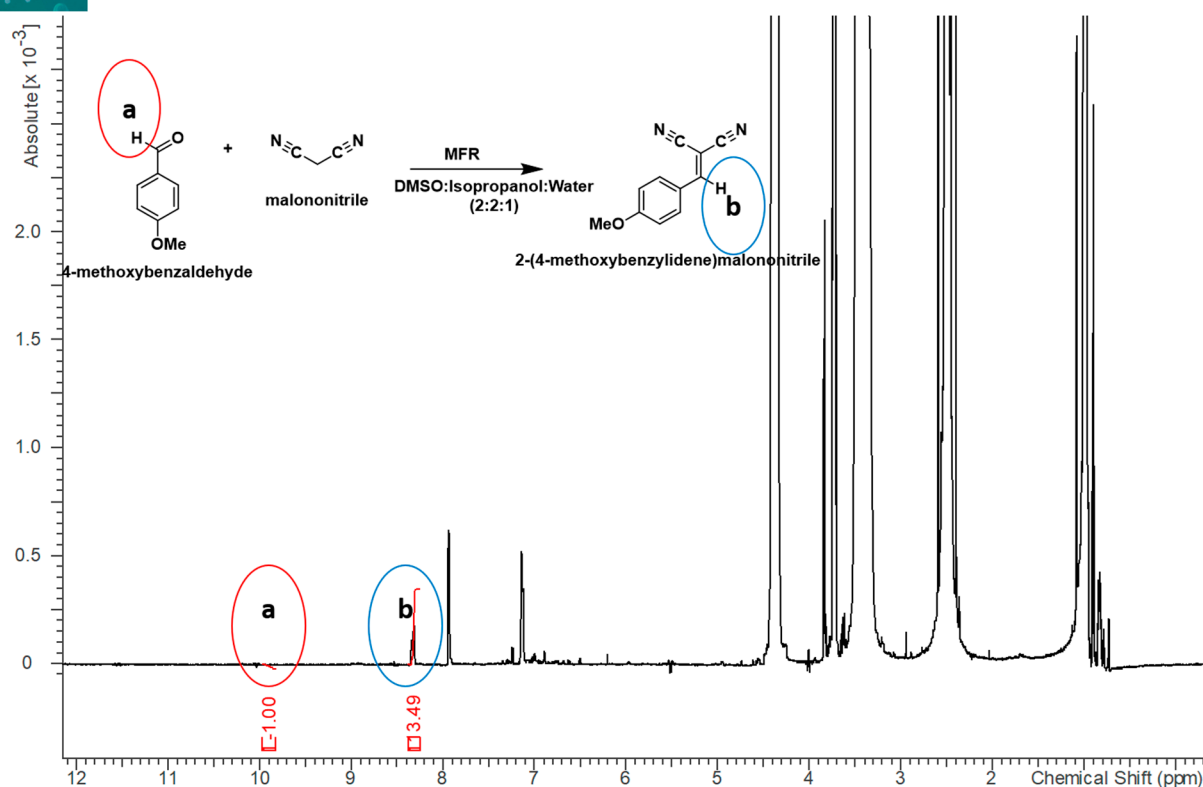

Figure S5:  $^1\text{H}$  spectra for determination of conversion of the reaction between 4-methoxy benzaldehyde and malononitrile using polymeric gel composition A in solvent mixture, DMSO:IP:W (v:v:v=2:2:1) for 8 h.

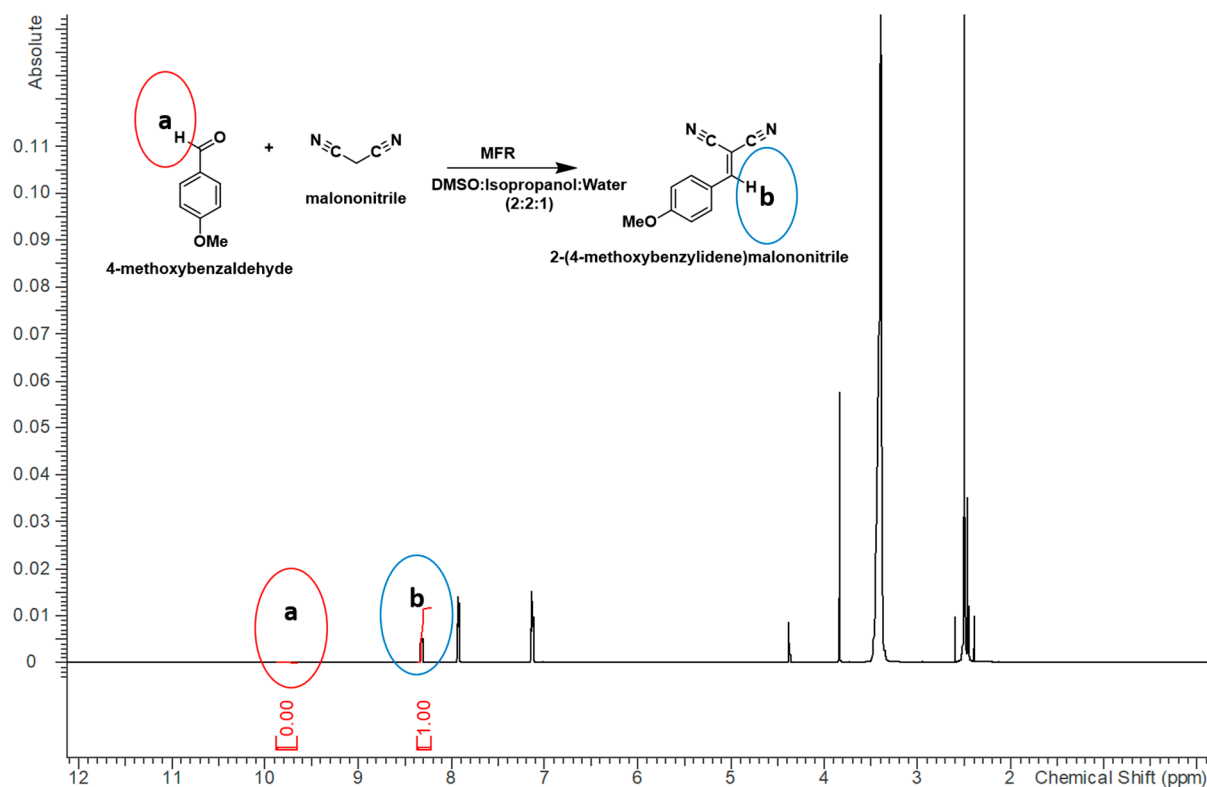

Figure S6:  $^1\text{H}$  spectra for determination of conversion of the reaction between 4-methoxy benzaldehyde and malononitrile using polymeric gel composition B in solvent mixture, DMSO:IP:W (v:v:v=2:2:1) for 8 h.

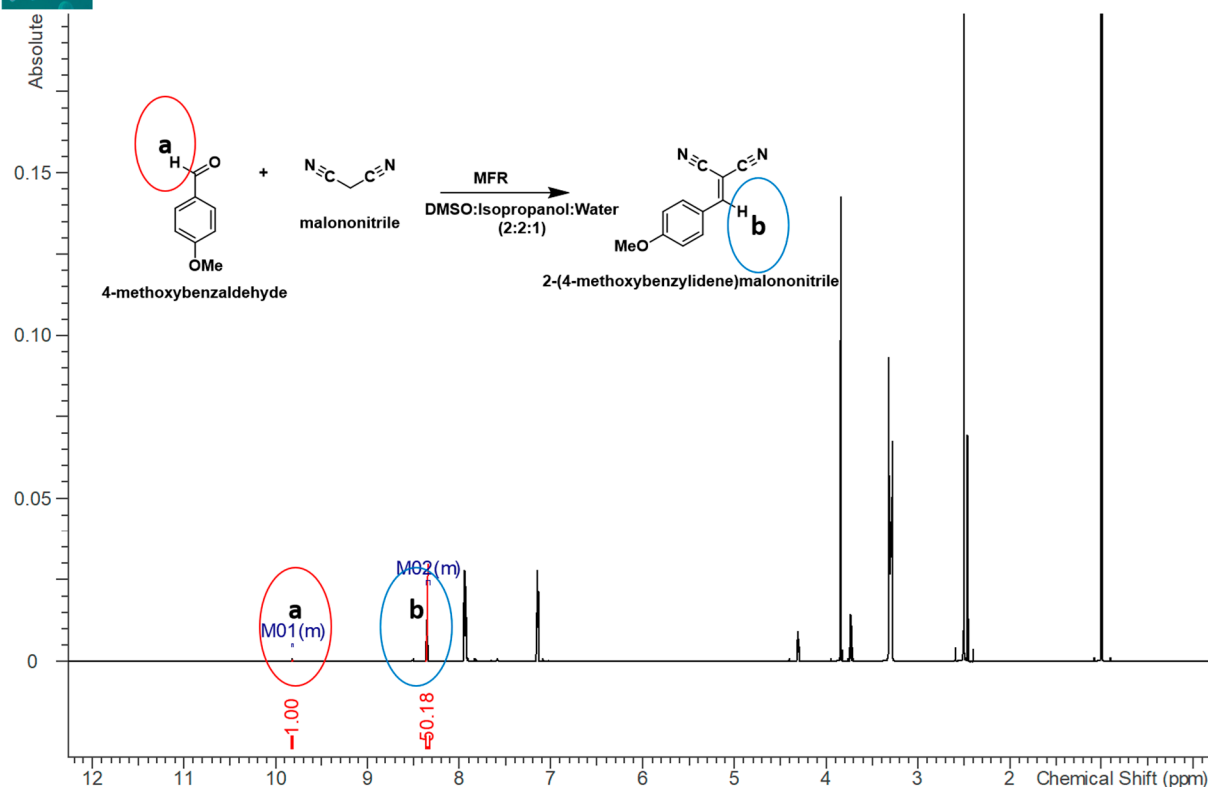

Figure S7:  $^1\text{H}$  spectra for determination of conversion of the reaction between 4-methoxy benzaldehyde and malononitrile using polymeric gel composition C in solvent mixture, DMSO:IP:W (v:v:v=2:2:1) for 8 h.

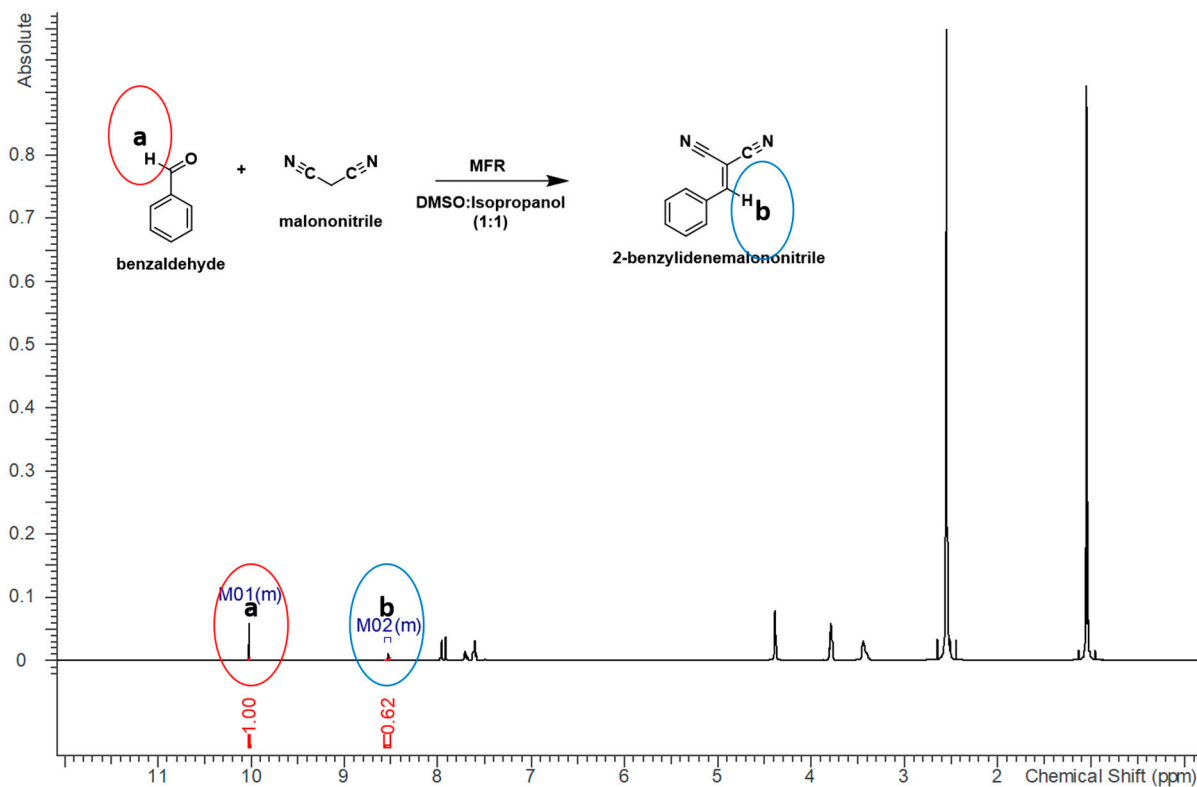

Figure S8:  $^1\text{H}$  spectra for determination of conversion of the reaction between benzaldehyde and malononitrile using polymeric gel composition A in solvent mixture, DMSO:IP (v:v=1:1) for 8 h.

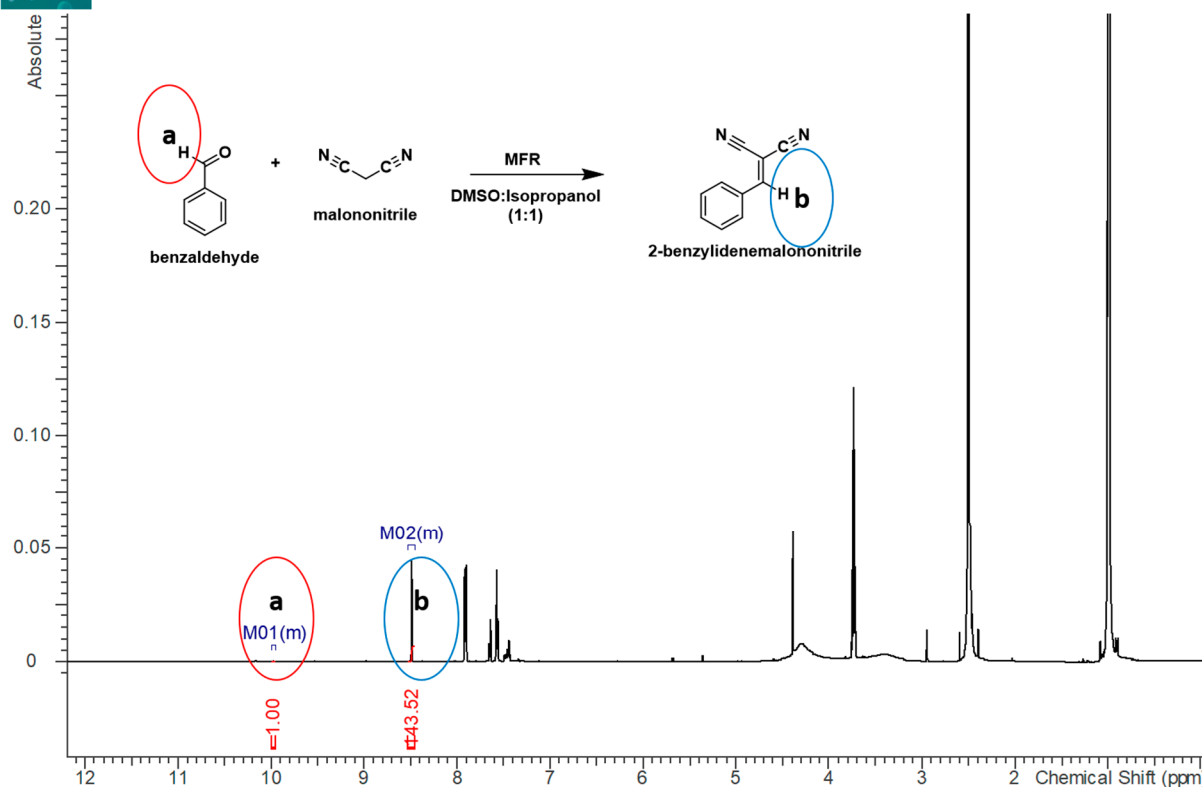

Figure S9:  $^1\text{H}$  spectra for determination of conversion of the reaction between benzaldehyde and malononitrile using polymeric gel composition B in solvent mixture, DMSO:IP (v:v=1:1) for 8 h.

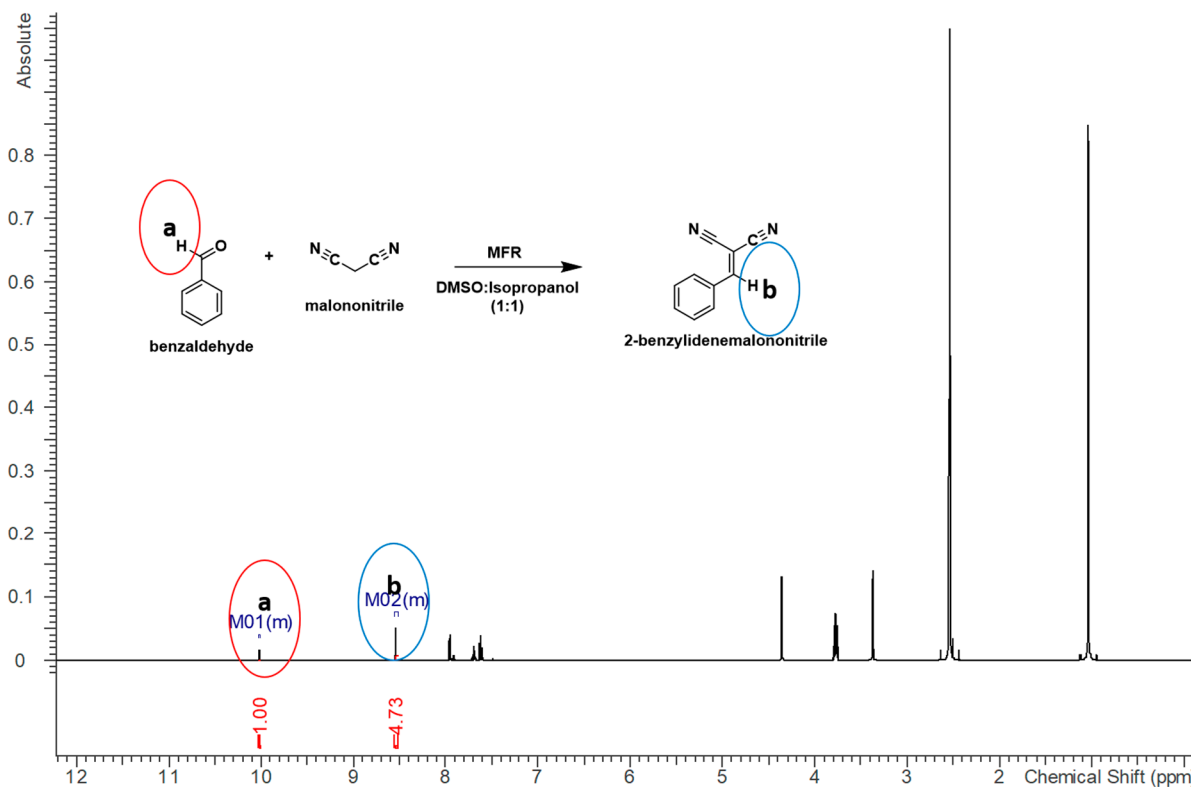

Figure S10:  $^1\text{H}$  spectra for determination of conversion of the reaction between benzaldehyde and malononitrile using polymeric gel composition C in solvent mixture, DMSO:IP (v:v=1:1) for 8 h.

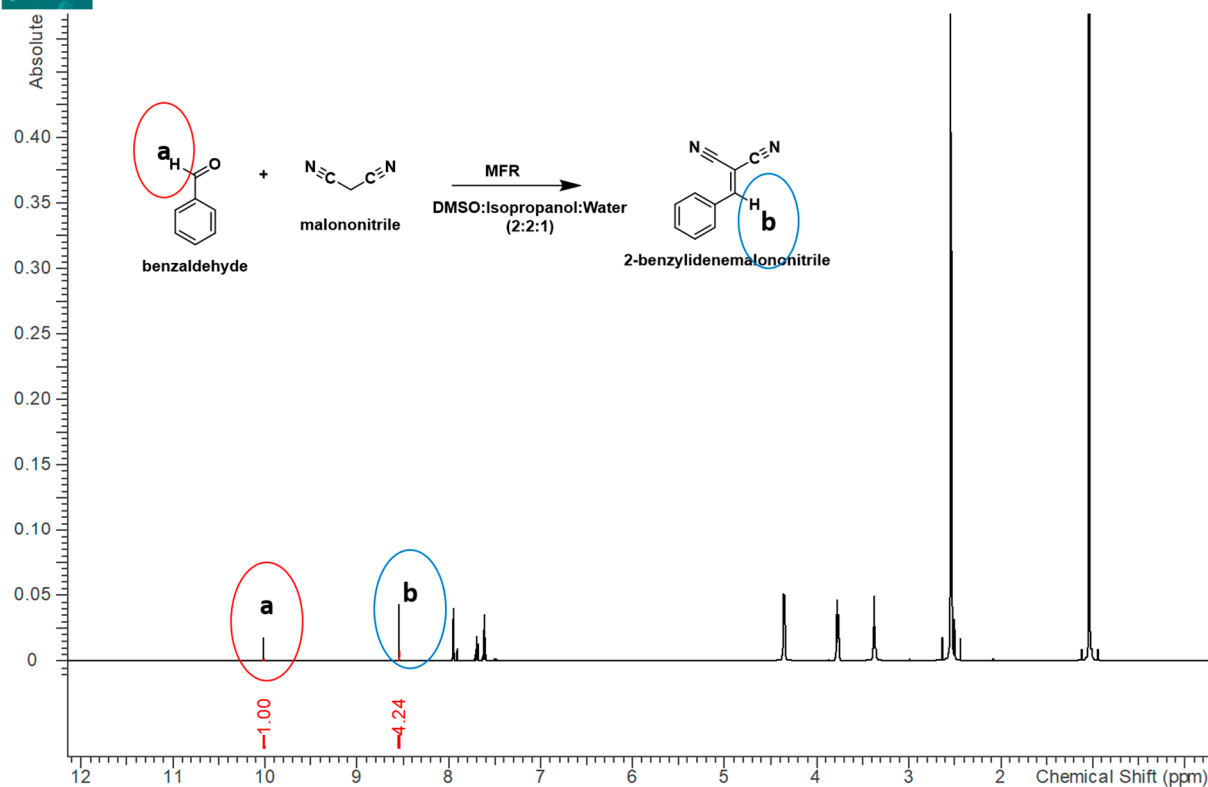

Figure S11:  $^1\text{H}$  spectra for determination of conversion of the reaction between benzaldehyde and malononitrile using polymeric gel composition A in solvent mixture, DMSO:IP.W (v:v:v=2:2:1) for 8 h.

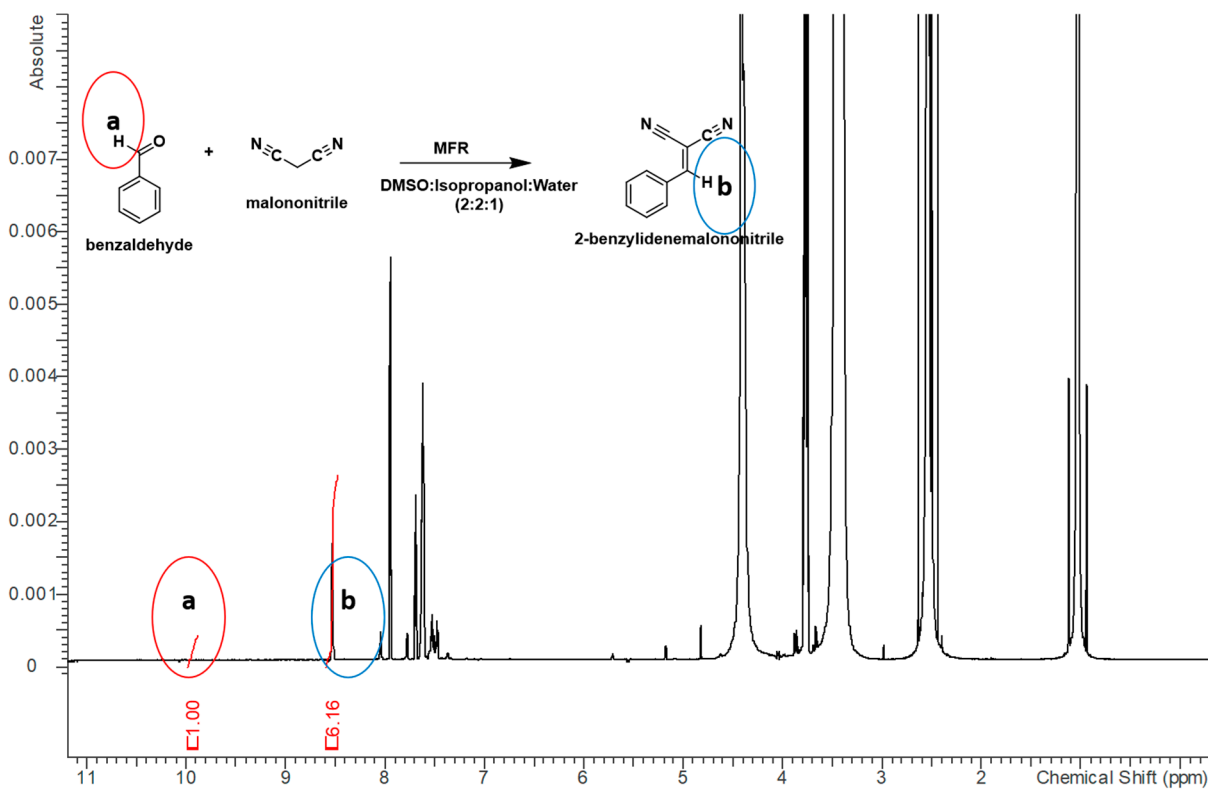

Figure S12:  $^1\text{H}$  spectra for determination of Conversion of reaction between benzaldehyde and malononitrile using polymeric gel composition B in solvent mixture, DMSO:IP.W (v:v:v=2:2:1) for 8 h.



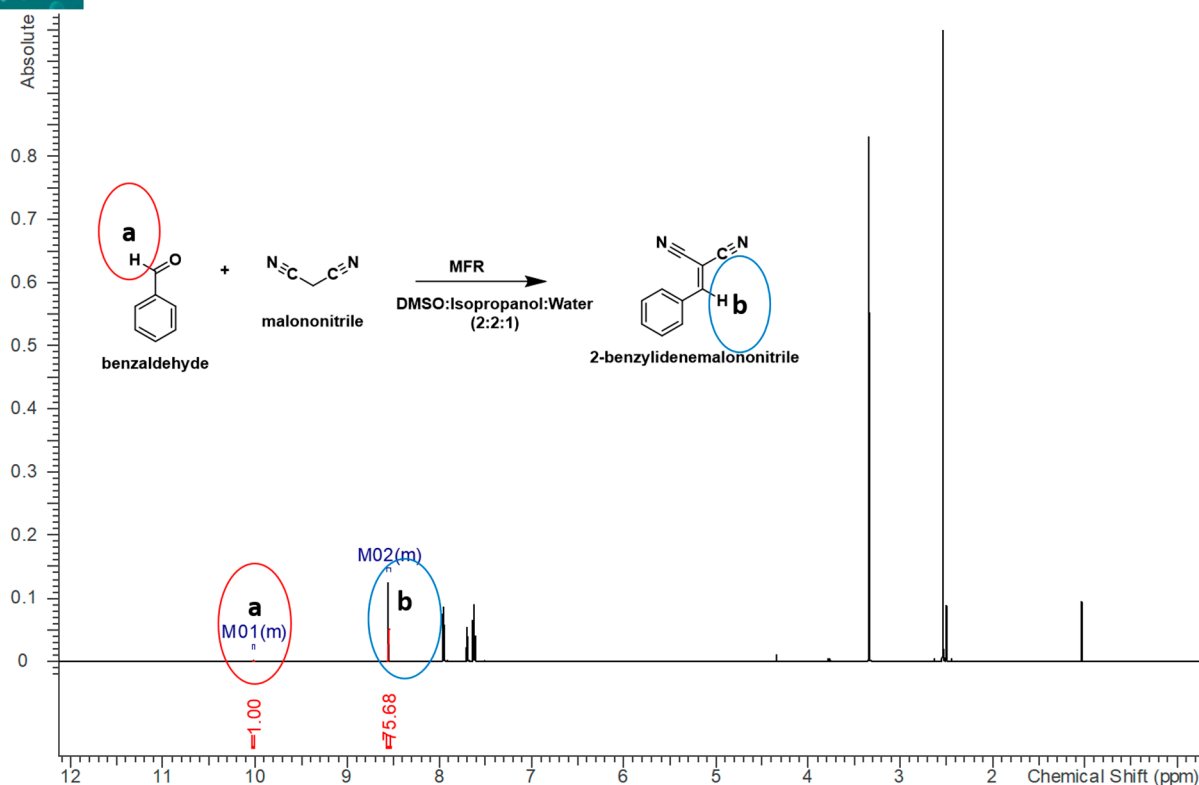

Figure S13:  $^1\text{H}$  spectra for determination of Conversion of reaction between benzaldehyde and malononitrile using polymeric gel composition C in solvent mixture, DMSO:IP.W (v:v=2:2:1) for 8 h.

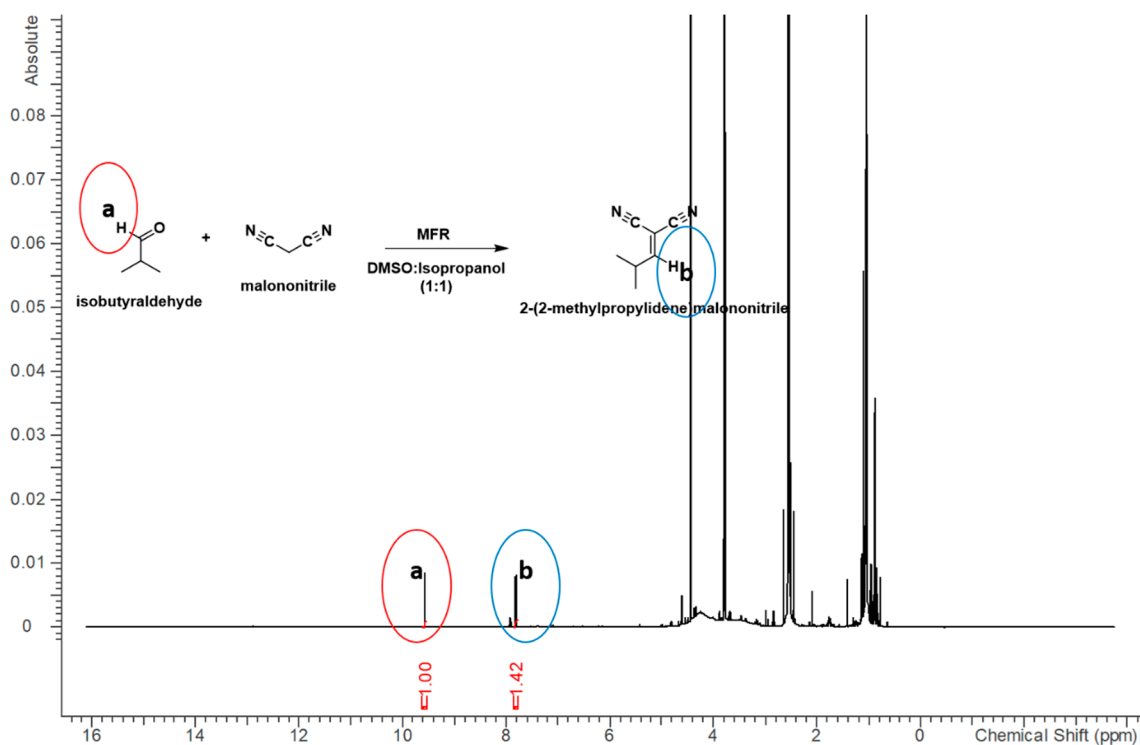

Figure S14:  $^1\text{H}$  spectra for determination of conversion of reaction between isobutyraldehyde and malononitrile using polymeric gel composition A in solvent mixture, DMSO:IP (v:v=1:1) for 8 h.

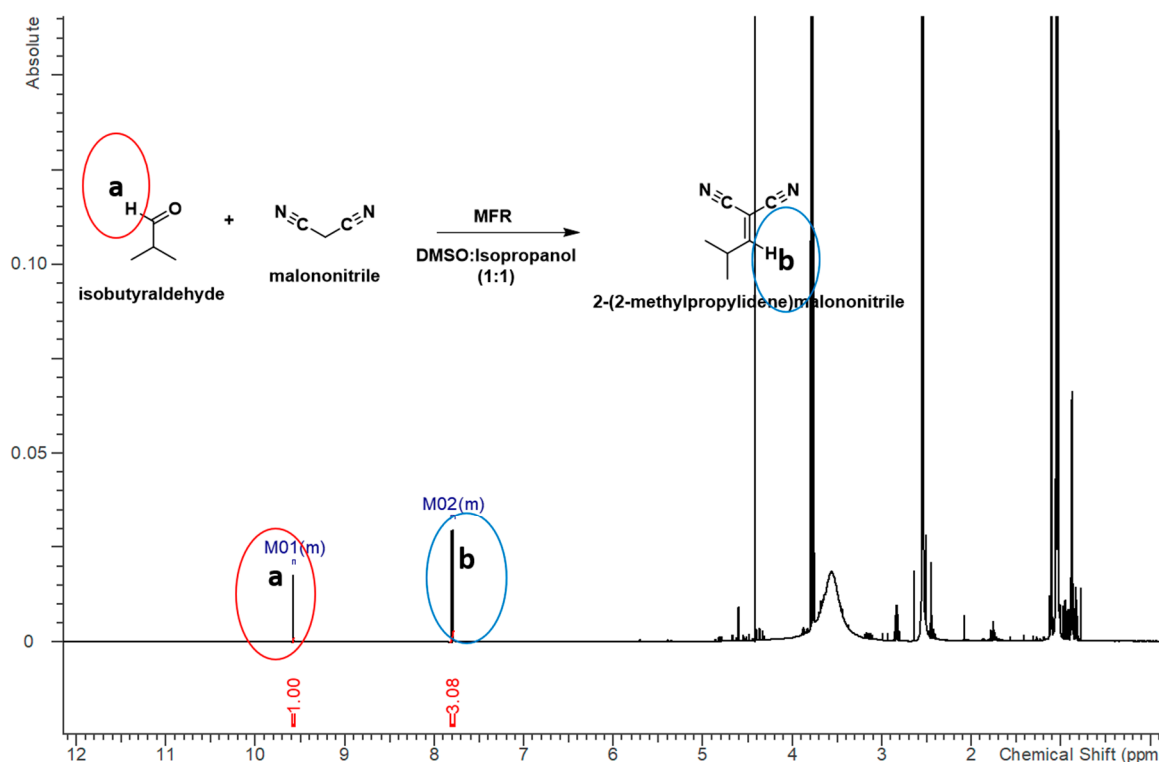

Figure S15:  $^1\text{H}$  spectra for determination of conversion of reaction between isobutyraldehyde and malononitrile using polymeric gel composition B in solvent mixture, DMSO:IP (v:v=1:1) for 8 h.

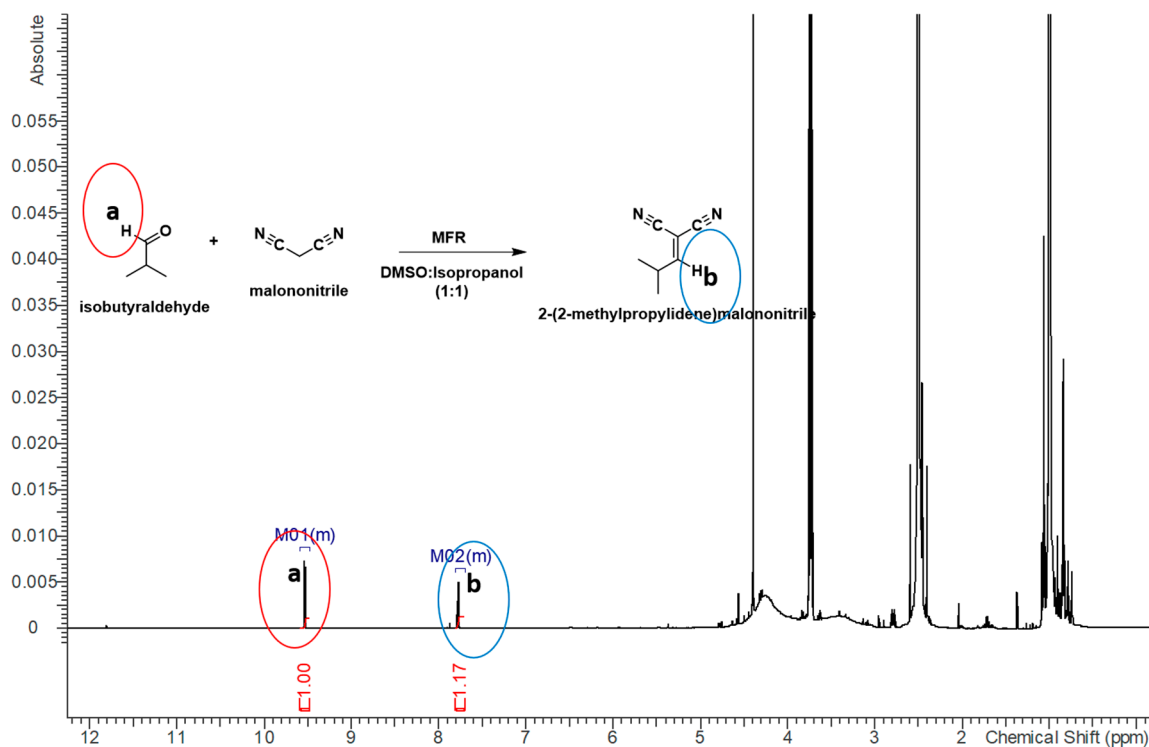

Figure S16:  $^1\text{H}$  spectra for determination of conversion of reaction between isobutyraldehyde and malononitrile using polymeric gel composition C in solvent mixture, DMSO:IP (v:v=1:1) for 8 h.

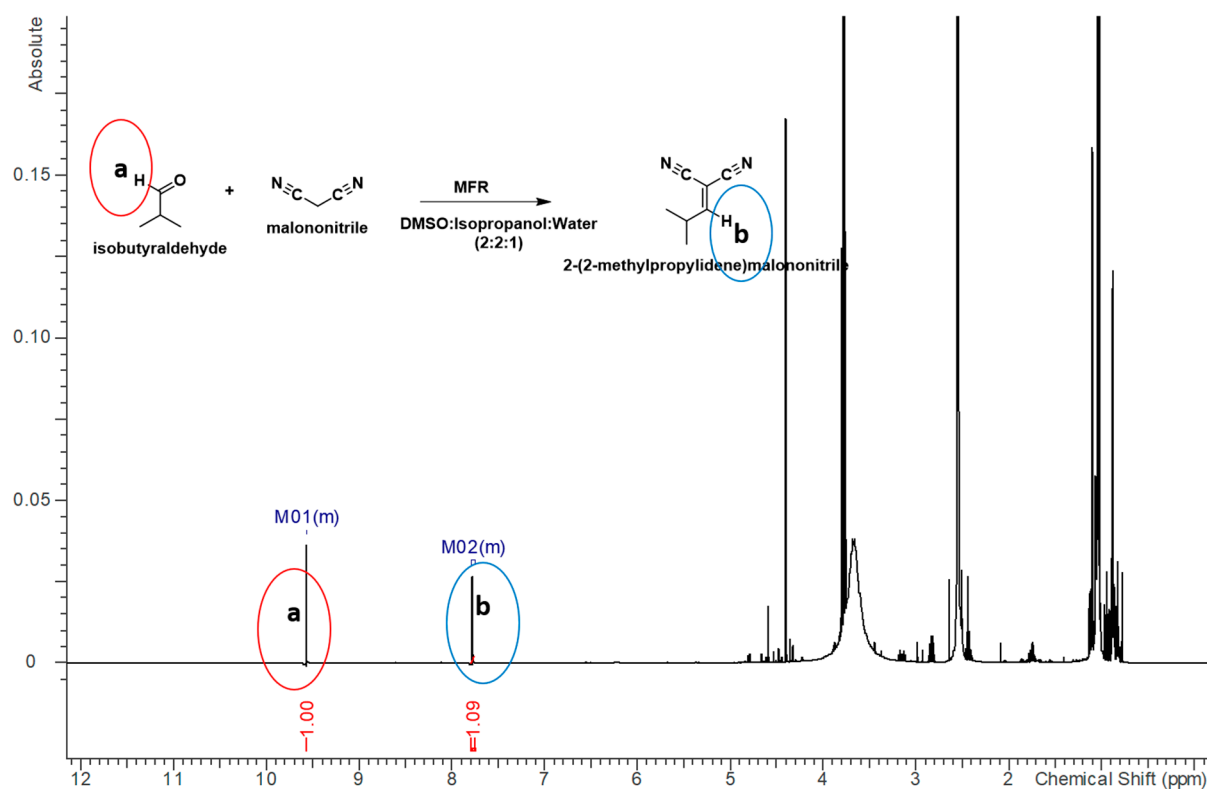

Figure S17:  $^1\text{H}$  spectra for determination of conversion of reaction between isobutyraldehyde and malononitrile using polymeric gel composition A in solvent mixture, DMSO:IP.W (v:v:v=2:2:1) for 8 h.

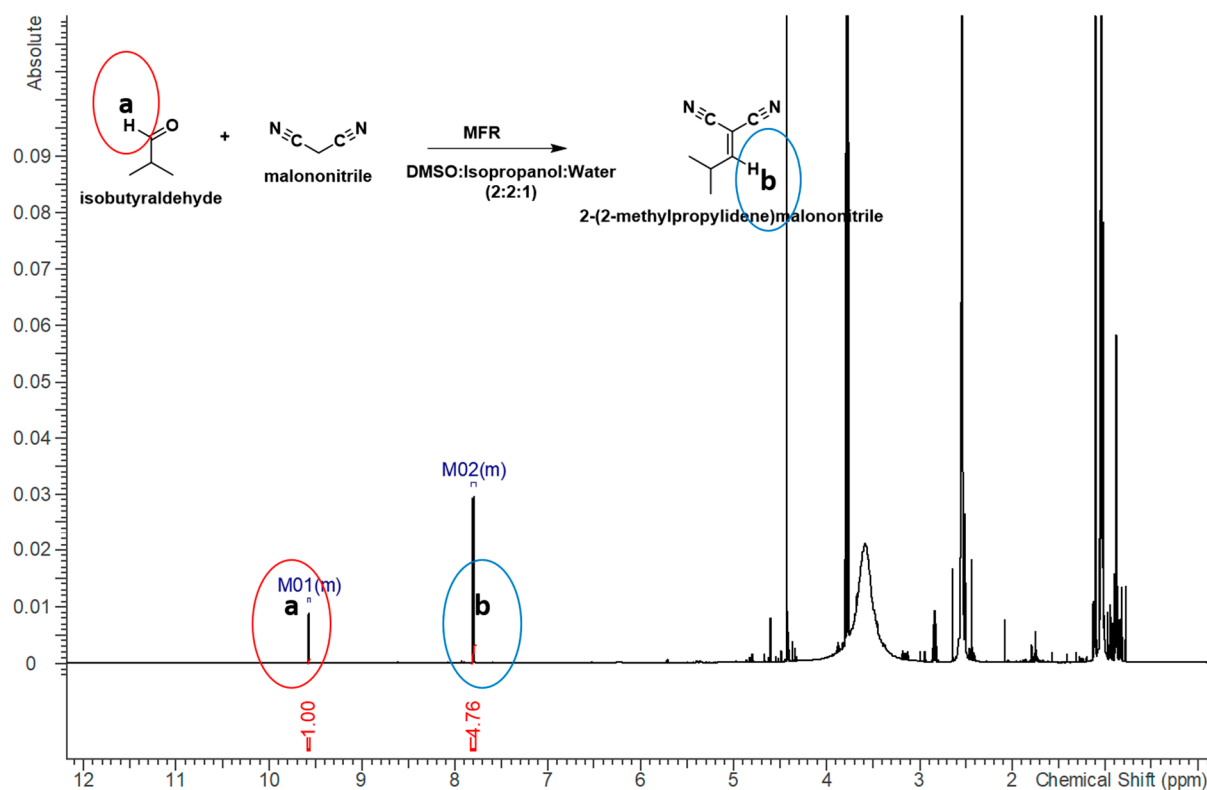

Figure S18:  $^1\text{H}$  spectra for determination of conversion of reaction between isobutyraldehyde and malononitrile using polymeric gel composition B in solvent mixture, DMSO:IP.W (v:v:v=2:2:1) for 8 h.

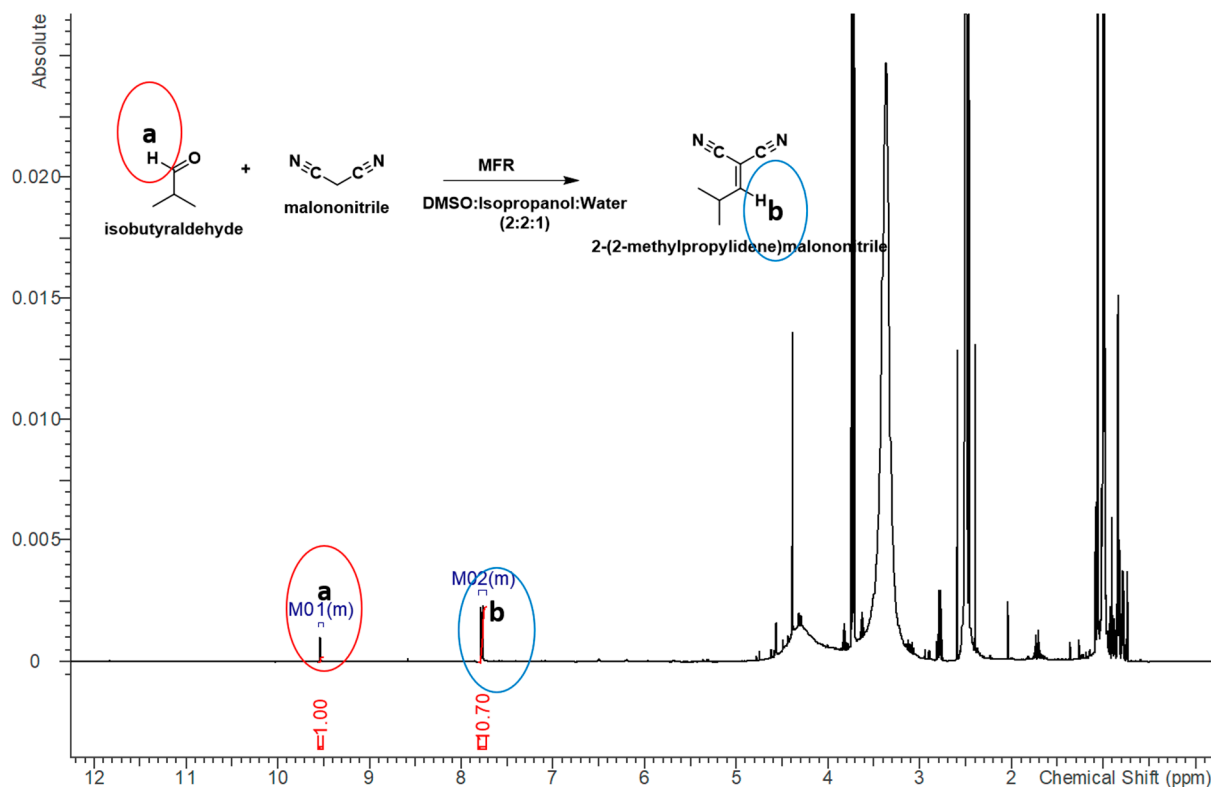

Figure S19:  $^1\text{H}$  spectra for determination of conversion of reaction between isobutyraldehyde and malononitrile using polymeric gel composition C in solvent mixture, DMSO:IP.W (v:v:v=2:2:1) for 8 h.

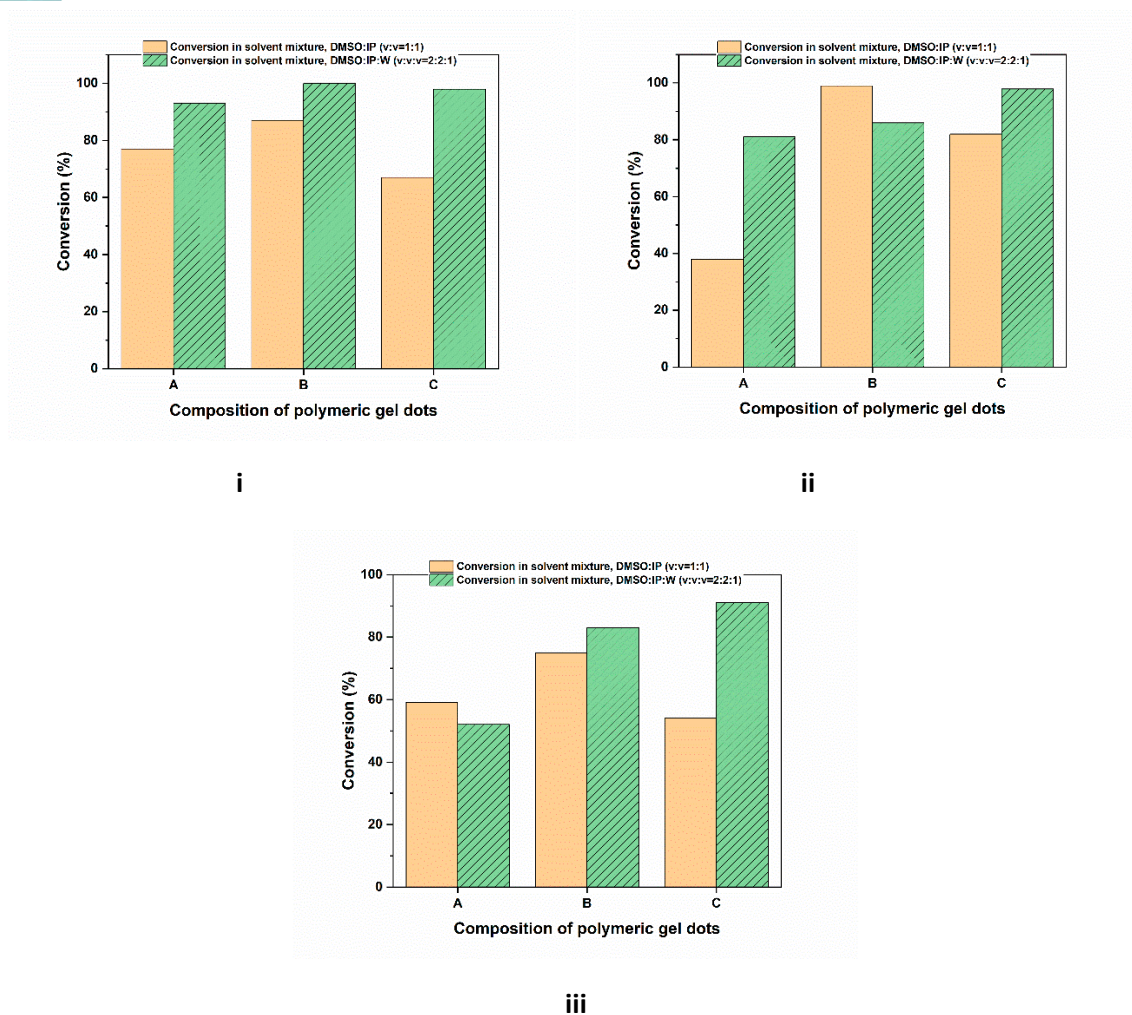

Figure S20: Conversion of the reaction with malononitrile and different aldehydes i) 4-methoxybenzaldehyde, ii) benzaldehyde and iii) isobutyraldehyde using various polymeric gel dots compositions A, B and C for 8 h.
